# Supplementary material for: Utilization of waste banana peels as heterogeneous catalysts in room-temperature biodiesel production using a homogenizer
Source: Royal Society of Chemistry journal article supplement (doi:10.1039/d3ra00016h), 2023-01-01
Supplement: d3ra00016h1.pdf [file d3ra00016h1.pdf]

## Supplementary Information

### Utilization of waste banana peels as heterogeneous catalyst in room temperature biodiesel production using a homogenizer

Juliati Br. Tarigan, Sabarmin Perangin-angin, Sylvia R. Simanungkalit, Neli P. Zega and Eko K. Sitepu\*

<sup>1</sup>Department of Chemistry, Universitas Sumatera Utara, Medan 20155, Indonesia

\* Correspondent author: [ekositepu@usu.ac.id](mailto:ekositepu@usu.ac.id)

**Table 1.** Fatty acid profile of palm oil biodiesel

|                   | Fatty Acid  | Percentage |
|-------------------|-------------|------------|
| C <sub>12:0</sub> | Lauric      | 0.32       |
| C <sub>14:0</sub> | Myristic    | 0.99       |
| C <sub>16:0</sub> | Palmitic    | 36.86      |
| C <sub>16:1</sub> | Palmitoleic | 0.18       |
| C <sub>18:0</sub> | Stearic     | 3.57       |
| C <sub>18:1</sub> | Oleic       | 46.03      |
| C <sub>18:2</sub> | Linoleic    | 11.36      |
| C <sub>18:3</sub> | Linolenic   | 0.21       |
| C <sub>20:0</sub> | Arachidic   | 0.33       |
| C <sub>20:1</sub> | Eicosenoate | 0.15       |
| SFA               |             | 42.07      |
| MUFA              |             | 46.36      |
| PUFA              |             | 11.57      |

**Table 2.** ANOVA and Tukey Post Hoc Test for biodiesel conversion of the calcined waste banana peels catalyze transesterification palm olein to biodiesel using homogenizer. Significance values below  $\alpha < 0.05$  are colour coded in red.

#### Effect of ratio molar

| Effect      | Univariate Tests of Significance for Biodiesel Conversion (%) (Spreadsheet1 in Ratio molar)<br>Sigma-restricted parameterization<br>Effective hypothesis decomposition |                  |          |          |          |
|-------------|------------------------------------------------------------------------------------------------------------------------------------------------------------------------|------------------|----------|----------|----------|
|             | SS                                                                                                                                                                     | Degr. of Freedom | MS       | F        | p        |
| Intercept   | 107806.2                                                                                                                                                               | 1                | 107806.2 | 14281.91 | 0.000000 |
| Ratio Molar | 296.5                                                                                                                                                                  | 4                | 74.1     | 9.82     | 0.001715 |
| Error       | 75.5                                                                                                                                                                   | 10               | 7.5      |          |          |

| Tukey HSD test; variable Biodiesel Conversion (%) (Spreadsheet1 in Ratio molar)<br>Approximate Probabilities for Post Hoc Tests<br>Error: Between MS = 7.5484, df = 10.000 |             |          |          |          |          |          |
|----------------------------------------------------------------------------------------------------------------------------------------------------------------------------|-------------|----------|----------|----------|----------|----------|
| Cell No.                                                                                                                                                                   | Ratio Molar | {1}      | {2}      | {3}      | {4}      | {5}      |
|                                                                                                                                                                            |             | 92.097   | 79.107   | 84.450   | 86.577   | 81.653   |
| 1                                                                                                                                                                          | 1:9         |          | 0.001401 | 0.041758 | 0.176323 | 0.006365 |
| 2                                                                                                                                                                          | 1:12        | 0.001401 |          | 0.197438 | 0.047171 | 0.785415 |
| 3                                                                                                                                                                          | 1:15        | 0.041758 | 0.197438 |          | 0.871749 | 0.726675 |
| 4                                                                                                                                                                          | 1:18        | 0.176323 | 0.047171 | 0.871749 |          | 0.256400 |
| 5                                                                                                                                                                          | 1:21        | 0.006365 | 0.785415 | 0.726675 | 0.256400 |          |

### Effect of catalyst weight

| Univariate Tests of Significance for Biodiesel Conversion (%) (CW)<br>Sigma-restricted parameterization<br>Effective hypothesis decomposition |          |                  |          |          |          |
|-----------------------------------------------------------------------------------------------------------------------------------------------|----------|------------------|----------|----------|----------|
| Effect                                                                                                                                        | SS       | Degr. of Freedom | MS       | F        | p        |
| Intercept                                                                                                                                     | 111818.9 | 1                | 111818.9 | 19526.21 | 0.000000 |
| Catalyst Weight (wt.%)                                                                                                                        | 977.3    | 4                | 244.3    | 42.67    | 0.000003 |
| Error                                                                                                                                         | 57.3     | 10               | 5.7      |          |          |

| Tukey HSD test; variable Biodiesel Conversion (%) (CW)<br>Approximate Probabilities for Post Hoc Tests<br>Error: Between MS = 5.7266, df = 10.000 |                        |          |          |          |          |          |
|---------------------------------------------------------------------------------------------------------------------------------------------------|------------------------|----------|----------|----------|----------|----------|
| Cell No.                                                                                                                                          | Catalyst Weight (wt.%) | {1}      | {2}      | {3}      | {4}      | {5}      |
|                                                                                                                                                   |                        | 75.663   | 84.450   | 80.443   | 94.347   | 96.797   |
| 1                                                                                                                                                 | 5                      |          | 0.008003 | 0.180004 | 0.000182 | 0.000177 |
| 2                                                                                                                                                 | 7                      | 0.008003 |          | 0.310790 | 0.003568 | 0.000762 |
| 3                                                                                                                                                 | 9                      | 0.180004 | 0.310790 |          | 0.000371 | 0.000211 |
| 4                                                                                                                                                 | 12                     | 0.000182 | 0.003568 | 0.000371 |          | 0.722746 |
| 5                                                                                                                                                 | 15                     | 0.000177 | 0.000762 | 0.000211 | 0.722746 |          |

### Effect of reaction time

| Univariate Tests of Significance for Biodiesel Conversion (%) (Spreadsheet14)<br>Sigma-restricted parameterization<br>Effective hypothesis decomposition |          |                  |          |          |          |
|----------------------------------------------------------------------------------------------------------------------------------------------------------|----------|------------------|----------|----------|----------|
| Effect                                                                                                                                                   | SS       | Degr. of Freedom | MS       | F        | p        |
| Intercept                                                                                                                                                | 120969.6 | 1                | 120969.6 | 21198.44 | 0.000000 |
| Reaction Time (min)                                                                                                                                      | 220.1    | 4                | 55.0     | 9.64     | 0.001838 |
| Error                                                                                                                                                    | 57.1     | 10               | 5.7      |          |          |

| Tukey HSD test; variable Biodiesel Conversion (%) (Spreadsheet14)<br>Approximate Probabilities for Post Hoc Tests<br>Error: Between MS = 5.7065, df = 10.000 |                     |          |          |          |          |          |
|--------------------------------------------------------------------------------------------------------------------------------------------------------------|---------------------|----------|----------|----------|----------|----------|
| Cell No.                                                                                                                                                     | Reaction Time (min) | {1}      | {2}      | {3}      | {4}      | {5}      |
|                                                                                                                                                              |                     | 87.513   | 91.603   | 89.630   | 84.450   | 95.820   |
| 1                                                                                                                                                            | 5                   |          | 0.292454 | 0.810245 | 0.545237 | 0.011382 |
| 2                                                                                                                                                            | 10                  | 0.292454 |          | 0.844503 | 0.027989 | 0.268077 |
| 3                                                                                                                                                            | 20                  | 0.810245 | 0.844503 |          | 0.132330 | 0.060083 |
| 4                                                                                                                                                            | 30                  | 0.545237 | 0.027989 | 0.132330 |          | 0.001339 |
| 5                                                                                                                                                            | 40                  | 0.011382 | 0.268077 | 0.060083 | 0.001339 |          |

### Effect of rotational speed

| Univariate Tests of Significance for Biodiesel Conversion (%) (Spreadsheet19) |          |                  |          |          |          |
|-------------------------------------------------------------------------------|----------|------------------|----------|----------|----------|
| Sigma-restricted parameterization                                             |          |                  |          |          |          |
| Effective hypothesis decomposition                                            |          |                  |          |          |          |
| Effect                                                                        | SS       | Degr. of Freedom | MS       | F        | p        |
| Intercept                                                                     | 133778.0 | 1                | 133778.0 | 36612.06 | 0.000000 |
| Rotational Speed (rpm)                                                        | 378.7    | 4                | 94.7     | 25.91    | 0.000029 |
| Error                                                                         | 36.5     | 10               | 3.7      |          |          |

| Tukey HSD test; variable Biodiesel Conversion (%) (Spreadsheet19) |                        |          |          |          |          |          |
|-------------------------------------------------------------------|------------------------|----------|----------|----------|----------|----------|
| Approximate Probabilities for Post Hoc Tests                      |                        |          |          |          |          |          |
| Error: Between MS = 3.6539, df = 10.000                           |                        |          |          |          |          |          |
| Cell No.                                                          | Rotational Speed (rpm) | {1}      | {2}      | {3}      | {4}      | {5}      |
|                                                                   |                        | 96.030   | 84.450   | 96.860   | 97.753   | 97.097   |
| 1                                                                 | 3000                   |          | 0.000305 | 0.981876 | 0.800970 | 0.955719 |
| 2                                                                 | 4000                   | 0.000305 |          | 0.000238 | 0.000204 | 0.000226 |
| 3                                                                 | 5000                   | 0.981876 | 0.000238 |          | 0.976322 | 0.999865 |
| 4                                                                 | 6000                   | 0.800970 | 0.000204 | 0.976322 |          | 0.992453 |
| 5                                                                 | 7000                   | 0.955719 | 0.000226 | 0.999865 | 0.992453 |          |

**Table 3.** ANOVA and Tukey Post Hoc Test for biodiesel yield of the calcined waste banana peels catalyze transesterification palm olein to biodiesel using homogenizer. Significance values below  $\alpha < 0.05$  are colour coded in red.

#### Effect of ratio molar

| Univariate Tests of Significance for Biodiesel Yield (%) (Spreadsheet1 in Ratio molar) |          |                  |          |          |          |
|----------------------------------------------------------------------------------------|----------|------------------|----------|----------|----------|
| Sigma-restricted parameterization                                                      |          |                  |          |          |          |
| Effective hypothesis decomposition                                                     |          |                  |          |          |          |
| Effect                                                                                 | SS       | Degr. of Freedom | MS       | F        | p        |
| Intercept                                                                              | 94276.60 | 1                | 94276.60 | 9854.505 | 0.000000 |
| Ratio Molar                                                                            | 476.37   | 4                | 119.09   | 12.449   | 0.000676 |
| Error                                                                                  | 95.67    | 10               | 9.57     |          |          |

| Tukey HSD test; variable Biodiesel Yield (%) (Spreadsheet1 in Ratio molar) |             |          |          |          |          |          |
|----------------------------------------------------------------------------|-------------|----------|----------|----------|----------|----------|
| Approximate Probabilities for Post Hoc Tests                               |             |          |          |          |          |          |
| Error: Between MS = 9.5669, df = 10.000                                    |             |          |          |          |          |          |
| Cell No.                                                                   | Ratio Molar | {1}      | {2}      | {3}      | {4}      | {5}      |
|                                                                            |             | 85.847   | 74.993   | 82.553   | 82.463   | 70.537   |
| 1                                                                          | 1:9         |          | 0.010740 | 0.695109 | 0.675195 | 0.001016 |
| 2                                                                          | 1:12        | 0.010740 |          | 0.079295 | 0.083758 | 0.441666 |
| 3                                                                          | 1:15        | 0.695109 | 0.079295 |          | 1.000000 | 0.005491 |
| 4                                                                          | 1:18        | 0.675195 | 0.083758 | 1.000000 |          | 0.005776 |
| 5                                                                          | 1:21        | 0.001016 | 0.441666 | 0.005491 | 0.005776 |          |

#### Effect of catalyst weight

| Univariate Tests of Significance for Biodiesel Yield (%) (CW)<br>Sigma-restricted parameterization<br>Effective hypothesis decomposition |          |                  |          |          |          |
|------------------------------------------------------------------------------------------------------------------------------------------|----------|------------------|----------|----------|----------|
| Effect                                                                                                                                   | SS       | Degr. of Freedom | MS       | F        | p        |
| Intercept                                                                                                                                | 91060.43 | 1                | 91060.43 | 11378.29 | 0.000000 |
| Catalyst Weight (wt.%)                                                                                                                   | 502.88   | 4                | 125.72   | 15.71    | 0.000259 |
| Error                                                                                                                                    | 80.03    | 10               | 8.00     |          |          |

| Tukey HSD test; variable Biodiesel Yield (%) (CW)<br>Approximate Probabilities for Post Hoc Tests<br>Error: Between MS = 8.0030, df = 10.000 |                        |          |          |          |          |          |
|----------------------------------------------------------------------------------------------------------------------------------------------|------------------------|----------|----------|----------|----------|----------|
| Cell No.                                                                                                                                     | Catalyst Weight (wt.%) | {1}      | {2}      | {3}      | {4}      | {5}      |
|                                                                                                                                              |                        | 71.250   | 82.553   | 70.660   | 84.287   | 80.823   |
| 1                                                                                                                                            | 5                      |          | 0.004522 | 0.998933 | 0.001676 | 0.013502 |
| 2                                                                                                                                            | 7                      | 0.004522 |          | 0.003184 | 0.939137 | 0.939527 |
| 3                                                                                                                                            | 9                      | 0.998933 | 0.003184 |          | 0.001227 | 0.009228 |
| 4                                                                                                                                            | 12                     | 0.001676 | 0.939137 | 0.001227 |          | 0.585012 |
| 5                                                                                                                                            | 15                     | 0.013502 | 0.939527 | 0.009228 | 0.585012 |          |

### Effect of reaction time

| Univariate Tests of Significance for Biodiesel Yield (%) (Spreadsheet14)<br>Sigma-restricted parameterization<br>Effective hypothesis decomposition |          |                  |          |          |          |
|-----------------------------------------------------------------------------------------------------------------------------------------------------|----------|------------------|----------|----------|----------|
| Effect                                                                                                                                              | SS       | Degr. of Freedom | MS       | F        | p        |
| Intercept                                                                                                                                           | 112975.4 | 1                | 112975.4 | 13426.53 | 0.000000 |
| Reaction Time (min)                                                                                                                                 | 269.3    | 4                | 67.3     | 8.00     | 0.003676 |
| Error                                                                                                                                               | 84.1     | 10               | 8.4      |          |          |

| Tukey HSD test; variable Biodiesel Yield (%) (Spreadsheet14)<br>Approximate Probabilities for Post Hoc Tests<br>Error: Between MS = 8.4143, df = 10.000 |                     |          |          |          |          |          |
|---------------------------------------------------------------------------------------------------------------------------------------------------------|---------------------|----------|----------|----------|----------|----------|
| Cell No.                                                                                                                                                | Reaction Time (min) | {1}      | {2}      | {3}      | {4}      | {5}      |
|                                                                                                                                                         |                     | 79.537   | 89.127   | 84.450   | 90.600   | 90.213   |
| 1                                                                                                                                                       | 5                   |          | 0.015615 | 0.301230 | 0.006224 | 0.007877 |
| 2                                                                                                                                                       | 10                  | 0.015615 |          | 0.342655 | 0.968125 | 0.989517 |
| 3                                                                                                                                                       | 20                  | 0.301230 | 0.342655 |          | 0.144514 | 0.183411 |
| 4                                                                                                                                                       | 30                  | 0.006224 | 0.968125 | 0.144514 |          | 0.999819 |
| 5                                                                                                                                                       | 40                  | 0.007877 | 0.989517 | 0.183411 | 0.999819 |          |

### Effect of rotational speed

| Univariate Tests of Significance for Biodiesel Yield (%) (Spreadsheet19)<br>Sigma-restricted parameterization<br>Effective hypothesis decomposition |          |                  |          |          |          |
|-----------------------------------------------------------------------------------------------------------------------------------------------------|----------|------------------|----------|----------|----------|
| Effect                                                                                                                                              | SS       | Degr. of Freedom | MS       | F        | p        |
| Intercept                                                                                                                                           | 121097.1 | 1                | 121097.1 | 23017.72 | 0.000000 |
| Rotational Speed (rpm)                                                                                                                              | 14.0     | 4                | 3.5      | 0.66     | 0.630667 |
| Error                                                                                                                                               | 52.6     | 10               | 5.3      |          |          |

| Tukey HSD test; variable Biodiesel Yield (%) (Spreadsheet19) |                        |               |               |               |               |               |
|--------------------------------------------------------------|------------------------|---------------|---------------|---------------|---------------|---------------|
| Approximate Probabilities for Post Hoc Tests                 |                        |               |               |               |               |               |
| Error: Between MS = 5.2610, df = 10.000                      |                        |               |               |               |               |               |
| Cell No.                                                     | Rotational Speed (rpm) | {1}<br>89.573 | {2}<br>90.600 | {3}<br>90.907 | {4}<br>90.020 | {5}<br>88.153 |
| 1                                                            | 3000                   |               | 0.979749      | 0.949060      | 0.999193      | 0.936998      |
| 2                                                            | 4000                   | 0.979749      |               | 0.999817      | 0.997703      | 0.693793      |
| 3                                                            | 5000                   | 0.949060      | 0.999817      |               | 0.988214      | 0.601493      |
| 4                                                            | 6000                   | 0.999193      | 0.997703      | 0.988214      |               | 0.851145      |
| 5                                                            | 7000                   | 0.936998      | 0.693793      | 0.601493      | 0.851145      |               |
